# Supplementary material for: Nitrous oxide activates layer 5 prefrontal neurons via SK2 channel inhibition for antidepressant effect
Source: Springer Nature journal article supplement (doi:10.1038/s41467-025-57951-y), 2025-04-03
Supplement: MOESM2 [file 41467_2025_57951_MOESM2_ESM.pdf › 41467_2025_57951_MOESM2_ESM.pdf]

## **Description of Additional Supplementary Files**

### **File name: Supplementary Movie 1**

Description: Time lapse movie of nitrous oxide induced layer 5 neuronal activity. Two-photon calcium imaging of layer 5 neurons under room air/wakefulness followed by nitrous oxide (50%) exposure.
