# Supplementary material for: Nitrous oxide activates layer 5 prefrontal neurons via SK2 channel inhibition for antidepressant effect
Source: Nat Commun. 2025 Apr 3;16:2999. doi: 10.1038/s41467-025-57951-y (PMC11968965; doi:10.1038/s41467-025-57951-y)
Supplement: Supplementary file 6 — Source Data [file 41467_2025_57951_MOESM6_ESM.xlsx]

## Sheet: Figure 1b
	Males	Females
	Control	O2			CORT	O2			CAI	O2
Test	Baseline (BL)	Retest	Post-trest		Baseline (BL)	Post-stress	Post-treatment		Baseline (BL)	Post-stress	Post-treatment
TST immobility time (s)	102	95	70		90.5	182	159		44	61	171
	61.5	66	22		104	124	147		56	181	174
	33	71	120		112	161	190		79	145	139
	98	120	66		36	167	122		83	133	199
	74	58	52		140	142	186		30.4	134	169
	25.6	111	56						97	159	155
	61.8	68	43		31	90	170		79	168	134
	48	39	92		97	193	122		65	200	213
	17	44	111		135	137	220		123	134	139
	45.3	90	85		77	176	166		114	152	125
					48	146	152
					55	216	201
	106	59	105		15	146	155
	84	85	73
	99	69	64
	121	140	82
	Control	N20			CORT	N20			CAI	N20
	Baseline (BL)	Retest	Post-trest		Baseline (BL)	Retest	Post-trest		Baseline (BL)	Post-stress	Post-treatment
	171	31	30		94	128	67		42	173	152
	30	121	25		13	98	35		102	142	107
	40	56	6		43	118	2		52	143	97
					144	200	182		134	171	45
	96.5	87	12		45	62	149		88	117	108
	82	140	49						82	192	121
	121	93	35		105	162	141
	19	106	75		149	189	140
	109	64	123		59	136	106
					183	214	104
	88	88.6	37		149	130	103
	65	88	41						100	155	130
	79	32.6	88		50	130	133		92	132	105
					11	136	102		112	170	133
	86	128.9	68		104	186	93		71	192	80
	69	92.9	91		102	156	140		49	78	65
	91	170.1	115		95	214	82
					78	149	128

## Sheet: Figure 1c
		Males	Females
		Control	O2			CORT	O2			CAI	O2
Open arm time in EPM (s)		Baseline (BL)	Retest	Post-trest		Baseline (BL)	Post-stress	Post-treatment		Baseline (BL)	Post-stress	Post-treatment
		215	170	42		286	99	127		225	158	131
		263	169	40		360.3	105	145		279	158	77
		492	234	38		414	40.9	190		380	51	50
		600	565	406		155	75	122		296	199	91
		227	208	85		284	64	186		218	0.7	258
		600	390	250						347	40	221
		293	205	400		118	103	188		337	289	189
		372	432	152		156	144	251		296	232	32
		448	143	280		306	40	111		261	96	11
		600	258	411		272	112	43		249	148	10
						192	67	99
						371	110	62
		232	153	322		258	145	30
		339	168	289
		332	210	145
		223	257	99
		Control	N20			CORT	N20			CAI	N20
		Baseline (BL)	Retest	Post-trest		Baseline (BL)	Retest	Post-trest		Baseline (BL)	Post-stress	Post-treatment
		280	227	261		204	112	141		219	145.6	134
		161	228	246		105	164	174		272	86	146
		268	291	239		128	226	172		151	106	168
						219	132	87		243	157	216
		267	255	171		249	193	250		158	66	122
		261	295	184						99	42	108
		241	63	227
		230	183	79		179	194	65		256	10	45
		251	265	139		253	45	168		215	95	193
						131	100	25		309	124	152
		345	276	243		197	97	117		388	105	119
		360	188	236		227	25	157		172	108	161
		255	133	262
		100	249	162		156	198	354
		181	196	229		196	175	263
		332	256	268		157	87	134
						190	70	283
						291	176	292
						200	50	250

## Sheet: Figure 1d
		Males	Females
		Control	O2			CORT	O2			CAI	O2
		Baseline (BL)	Retest	Post-trest		Baseline (BL)	Post-stress	Post-treatment		Baseline (BL)	Post-stress	Post-treatment
Sucrose Pref. Index		0.704698	0.636364	0.64		0.551402	0.666667	0.35		0.215686	0.25	0.3
		0.899441	0.4	0.3		0.690163	-0.666667	0		0.75	-1	0
		0.875862	0.555556	0.33		0.683544	0.714286	0.2		0.636364	0.428571	-0.3
		0.6	0.333333	0.7		0.818182	0	-0.3		0.529412	-0.111111	0.1
		0.925926	0.655172	0.9		0.699248	0.25	0.1		0.666667	0	-0.1
		1	0.555556	0.55						0.478261	0.375	0.25
		0.666667	0.5	0.5		0.538462	-0.5	0.45		0.714286	0.25	-0.35
		0.666667	0.473684	0.33		0.636364	-0.01	0.1		0.2	0.5	0.75
		0.6	0.454545	1		0.857143	0	0		0.384615	0	0.35
		1	0.0909091	0		0.939394	0.2	-0.1		1	0.454545	0.4
						0.5	0.3	0.3
						0.272727	-0.6	0.6
		0.6	1	0.9		0.2	0.2	-0.6
		0	0.25	0.3
		0.6	0.8	0.7
		0.277778	0.393939	0.5
		Control	N20			CORT	N20			CAI	N20
		Baseline (BL)	Retest	Post-trest		Baseline (BL)	Retest	Post-trest		Baseline (BL)	Post-stress	Post-treatment
		0.8	0.8	0.333333		0.52381	0.2	0.2		0.5	0	0.2
		0.545455	0.545455	0.333333		0.757576	0.333333	0.466667		0.636364	-0.2	0.6
		0.830508	0.830508	0.75		0.25	0.2	0.489362		0.333333	0	0.555556
						0.362319	-0.2	0.220339		0.6	-0.333333	0.846154
		0.692308	0.428571	0.935484		0.745455	0	0.285714		0.666667	0.555556	0.764706
		0	0	0.333333						0.269841	-0.0810811	0.63964
		0.636364	-0.025641	0.714286
		1	1	0.333333		0.733333	-0.473684	0.212121
		0	0.2	0.6		0.552239	0.333333	0.833333
						0.382353	-0.333333	0.590909
		0.333333	0.333333	0.5		0.487805	-0.0163934	0.555556
		0.971831	0.971831	1		-0.0322581	0.0163934	0.818182		0.568627	0.6	0.6
		0.8	0.8	0.5						1	0.333333	0.65
										0.333333	0.459459	0.03
		-0.2	-0.2	0.6		0.463415	0.5	-0.290323		0.166667	-0.111111	0.42
		0.924528	0.924528	0.75		0.661538	-0.2	0.666667		0.690141	-0.481482	0.727891
		0.6	0.666667	0.333333		0.631579	0	0.666667
						0.74359	0	0.333333
						0.589041	0.333333	0.333333
						0.47619	0.1	0.21

## Sheet: Figure 1f
	Control				CORT				CAI
	Location (um)	Room air	Nitrous (50%)		Location (um)	Room air	Nitrous (50%)		Location (um)	Room air	Nitrous (50%)
	365	3.21606	16.2947		258	9.82284	21.7602		260	3.51449	8.86643
	365	8.02951	3.64614		258	5.58978	2.30113		260	5.53483	5.67434
	365	22.6321	8.96877		258	3.45434	0.487537		260	2.79129	5.36315
	365	0.324418	4.7079		258	2.85072	3.23083		260	4.15757	2.08276
	365	5.7724	11.3727		258	3.37533	2.20118		260	1.89346	5.712
	365	0.583155	3.91077		258	3.60161	12.6528		260	5.0676	6.69902
	365	6.54995	6.49935		258	1.46189	0.994153		260	4.36712	4.73809
	365	11.5473	1.75962						260	2.36491	5.75764
					220	17.3607	11.5321		260	3.02842	4.38975
	447	63.8163	0.734286		220	9.72014	10.9467
	447	0.600169	7.26905		220	25.3619	16.0347		220	2.77673	7.47351
	447	10.7354	-0.141037		220	7.81373	5.17751		220	3.41144	3.62439
	447	6.91987	5.98431		220	13.4787	5.91433		220	6.32045	3.53503
	447	8.22681	3.87226		220	32.3337	3.72888		220	3.31967	6.47239
	447	5.30222	2.63097		220	6.33325	14.0011		220	1.96614	4.36238
					220	4.6605	5.97302		220	1.36155	5.83422
	407	8.23099	8.75204		220	1.6497	1.53457		220	2.20454	5.0648
	407	3.10728	6.20064						220	3.21168	5.76616
	407	7.84414	6.97647		187	1.46977	6.78456		220	3.36582	6.02886
	407	6.86951	6.56645		187	1.49677	4.81476		220	1.561	2.71379
	407	7.98465	5.2887		187	8.16863	18.11		220	1.44047	5.77812
	407	4.54952	2.77395		187	1.27814	4.47975
	407	9.24605	3.04419		187	1.96279	6.12072		351	13.7312	20.7638
	407	12.8672	8.39965		187	1.4012	2.24316		351	5.74097	12.2759
	407	4.33036	-0.610016		187	2.96814	1.60853		351	22.7475	19.7741
					187	7.54462	9.56069		351	7.52981	14.3419
	286	9.04024	12.4307		187	0.212997	0.167294		351	6.43779	11.6042
	286	6.06634	6.25842		187	-0.293892	-0.440105		351	9.57213	21.885
	286	18.1044	7.53156						351	9.46054	11.0287
	286	1.60618	1.52177		330	62.2084	3.9		351	5.26901	13.1119
	286	24.0411	4.39606
	286	1.09546	-0.756158		437	18.9657	12.7989		196	6	8.60791
	286	2.77737	2.15619		437	40.3057	95.5178		196	4	75.2728
					437	18.8951	10.6303		196	20.7227	12.9442
	251	3.06087	5.69609		437	23.7129	6.3353		196	15.6067	8.73266
	251	0.0232314	2.904		437	17.897	4.33147		196	2.08543	10.7925
	251	4.54376	4.0243		437	23.2137	13.8085		196	2.10128	1.35674
	251	3.77875	2.78931		437	7.67353	12.6676		196	0.213442	0.191622
	251	1.41399	0.176223		437	8.65806	10.4945		196	-1.26064	3.23947
	251	3.20897	0.871581		437	12.2093	3.919		196	37.8219	29.0313
	251	13.1739	7.082		437	3.79048	7.98541		196	10.5973	16.1084
	251	5.77447	2.79618		437	4.3389	6.95112		196	9.64892	4.38824
	251	11.9554	9.38071
					353	7.25791	23.8445		285	-1.82407	-0.0964109
	403	26.6908	6.40144		353	21.1246	8.27938		285	21.3224	35.7916
	403	8.00639	7.17368		353	13.3252	10.1425		285	0.174988	2.302
	403	3.59895	3.0489		353	25.1061	18.2764		285	7.99921	14.8909
	403	6.54656	1.41464		353	18.7466	18.7697		285	19.3608	6.72659
	403	5.57481	5.85074		353	4.8015	10.7741		285	28.2547	16.078
					353	15.3046	29.4821		285	7.6247	14.3972
	365	4.76133	4.0387		353	20.132	6.26598		285	-0.195509	13.9227
	365	3.66246	5.58956		353	11.1474	20.0129		285	1.35493	16.1734
	365	5.85836	6.33218		353	10.0672	15.9637		285	24.7354	34.4461
	365	7.6815	4.61823
	365	2.86788	2.6346		328	17.3773	23.459		319	15.0763	14.5821
	365	0.893277	1.70796		328	29.3218	12.2753		319	4	3.7554
	365	0.991766	1.86963		328	13.8826	9.55707		319	30.3894	7.14327
					328	12.5523	9.03511		319	-0.32319	6.47578
	190	5.30308	3.60568		328	8.9041	14.8261		319	5.24452	21.4706
	190	2.48724	5.73033		328	5.90061	28.2897		319	-0.934258	4.26678
	190	6.47402	4.72479		328	8.59947	8.19907		319	3.1685	6.77688
	190	3.16712	4.21996		328	7.21855	2.02566		319	-2.86669	0.0155848
	190	3.29983	4.00209		328	6.35362	6.90555		319	-1.8652	-1.89901
	190	2.14643	4.32277		328	7.74486	5.24601		319	-0.501603	7.38628
	190	2.91217	3.59327						319	2.44943	2.74176
					247	4.24729	3.24785		319	-0.949437	2.28711
	366	3.66687	7.971		247	4.75673	5.25614
	366	4.25403	6.01414		247	-0.568233	3.22595
	366	2.38143	7.8195		247	-9.13296	-4.22198		600	14.8216	11.0309
	366	4.05144	3.45677		247	1.38987	8.82393		600	27.6197	116.505
	366	0.717204	3.21415		247	3.33734	5.00256		600	3.94285	74.3311
					247	2.07515	1.83654		600	18.2741	46.2967
	266	92.6935	106.195		247	3.95505	5.06028		600	-0.858134	20.1318
	266	5.40252	7.78066		247	0.536303	3.71016		600	-1.5844	7.93088
	266	54.4338	108.849						600	39.5196	190.095
					351	42.5364	4.25735		600	34.6899	51.332
	219	2.60825	5.0271		351	16.1135	-0.827807		600	0.106095	29.7714
	219	1.72953	5.21508		351	7.47452	-7.43462		600	4.18266	30.6814
	219	0.587429	6.1873		351	4.14379	-0.722385
	219	4.62516	6.08193		351	-4.05696	2.22215		661	1.11822	9.18686
	219	3.17559	33.4663		351	24.0766	-0.467379		661	10.5192	123.274
					351	4.17217	24.6596		661	2.18096	163.584
	396	75.7507	113.323		351	13.5827	5.27106		661	0.471132	18.1872
	396	30.5429	134.594		351	-5.30159	-5.7776		661	-1.08734	47.231
	396	14.1676	50.4528		351	3.96943	-2.65675		661	0.608186	27.4534
	396	6.74027	11.9358						661	5.38718	147.862
	396	8.49878	13.2841		326	18.5408	3.55625		661	3.636	38.4339
	396	19.2125	30.0034		326	74.3256	47.9249		661	1.31997	37.4568
	396	7.6761	42.4323		326	19.2766	14.507		661	-0.224448	23.9541
	396	11.6008	10.594		326	7.55771	110.28
	396	19.0742	8.08363		326	8.10107	1.25397		684	10.6979	21.3347
					326	6.49082	1.73845		684	9.37677	17.346
	356	9.29295	10.9679		326	0.38047	3.60404		684	10.0141	55.0607
	356	6.7841	8.77056		326	4.84895	23.0392		684	9.38866	24.188
	356	26.8678	44.8005		326	12.7221	2.06079		684	5.97803	23.4845
	356	7.73132	11.0972						684	13.2451	67.3791
	356	9.88292	16.4606		232	3.03022	1.4953		684	14.3736	32.6174
					232	8.73823	7.55368		684	5.29699	38.0121
	215	70.8343	3.59524		232	-3.57042	4.73428
	215	24.43	79.5927		232	-1.11608	3.1695		672	4.96572	83.5855
	215	44.8001	98.1691		232	-4.11509	2.45408		672	8.0027	104.614
	215	6.74819	2.19822		232	-2.99747	1.2858		672	1.23516	17.2004
	215	13.6668	14.7327		232	-0.192619	0.892028		672	6.00295	15.8379
	215	9.17661	4.09782		232	1.0459	1.83393		672	3.93271	29.028
	215	3.80175	1.15184		232	-1.39707	7.23601		672	9.55665	77.832
	215	42.3184	59.479		232	8.38068	3.5891		672	3.41961	11.3915
	215	11.4578	22.9006						672	9.20091	9.49806
					661	2.05737	72.2572		672	6.47459	18.6743
	182	6.55154	5.62304		661	0.30642	30.8797
	182	1.67773	-0.243119		661	1.74676	6.86056		592	8.91306	66.2741
					661	1.22709	20.7822		592	15.0083	15.1933
	386	3.03255	2.67382		661	17.3619	14.9812		592	5	58.926
	386	2.55079	3.33239		661	9.87245	13.8868		592	6.68642	11.4478
					661	5.12464	40.0435		592	7.38946	18.9168
	328	41.2995	8.72028		661	-1.24549	11.7833		592	2.50535	10.3795
	328	52.8113	28.4077		661	-1.80064	1.49747		592	7.14341	22.6618
	328	51.6163	13.1671						592	2.48926	17.8933
	328	50.1965	33.2117		620	2.47865	17.1811		592	6.26088	52.7408
	328	40.5126	40.0477		620	1.56276	43.2506
	328	26.384	15.4261		620	11.11	17.8428		527	21.2774	79.5077
	328	13.2347	8.29505		620	13.0561	38.5485		527	0.00238095	82.7125
	328	38.9833	11.2632		620	4.11236	24.5466		527	-3.29655	20.3844
	328	29.0739	22.8184		620	4.90793	98.89		527	1.21656	45.1028
	328	33.2109	11.8722		620	4.49579	33.1195		527	-0.407918	88.4256
	328	60.6718	15.1506		620	4.56603	29.7358		527	27.4885	79.8346
	328	59.6103	82.1045		620	0.396124	9.4464		527	6.05923	39.5271
					620	1.48405	15.3475		527	2	108.137
	245	79.6276	40.327		620	2.62184	19.7646		527	12.6309	49.3258
	245	51.8083	13.9175						527	4.71812	73.1381
	245	17.8535	16.4058		536	1.60528	73.1724		527	-1.2388	59.0682
	245	65.1737	80.9143		536	6.33711	95.6965		527	14.2405	103.818
	245	34.8459	15.981		536	9.51234	34.1041		527	6.55666	119.436
	245	31.9847	13.9557		536	3.31436	81.5448
	245	3.45603	6.19405		536	4.31665	56.7185		577	21.3065	74.6811
	245	15.1152	13.3968		536	20.6637	23.9691		577	43.2158	23.899
	245	14.7221	26.9914		536	74.3609	4.42595		577	-2.31816	174.861
	245	35.5755	27.1069		536	0.955918	8.59512		577	3.3734	98.7532
	245	28.9225	11.7774		536	5.6	10.2656		577	8.2061	88.2508
		16.3947	16.0651						577	-5.92755	16.1549
					555	2.4406	2.42507
	527	5.52896	5.48395		555	0.575136	6.82922		596	0.893626	78.519
	527	3.85917	10.7129		555	0.638725	114.616		596	3.20054	68.4717
	527	2.08077	5.60066		555	9.47646	18.7401		596	20.8147	20.4014
	527	7.99528	5.44829		555	-1.90974	19.9002		596	11.4243	26.8756
	527	5.34741	9.28738		555	7.38669	1.9008		596	0.0530739	13.5552
	527	7.17323	6.49639			2.95809	21.6277		596	-1.54253	25.078
	527	4.10925	5.30177						596	-1.44087	53.5697
	527	4.54699	5.7357		595	2.10037	24.0592		596	-3.97167	74.574
					595	4.55977	116.487		596	-0.187332	71.3506
	500	4.79433	47.6057		595	3.07117	9.76627		596	-2.16075	39.2538
	500	2.07859	24.1541		595	4.67891	23.9675		596	-0.621331	254.698
	500	2.8921	23.1936		595	1.18279	16.274		596	-2.46317	22.572
	500	5.82413	14.8615
	500	1.5251	14.1921		619	1.82802	24.5556		619	-2.69052	8.3894
	500	2.50054	21.4134		619	2.57631	13.5236		619	-0.0785278	13.265
	500	0.661563	7.37079		619	0.707406	92.7677		619	22.7513	31.2908
	500	6.77829	25.7821		619	4.44821	62.4949		619	0.189004	11.8293
	500	6.94436	1.64832		619	-0.183548	46.5828		619	3.10515	129.001
					619	8.75049	10.4695		619	5.8	14.2912
	533	10	30.0469		619	3.79189	25.1106		619	15.6097	24.4632
	533	6.22161	68.0274		619	-1.08073	11.4909		619	1.1114	43.2525
	533	10.0979	20.1463		619	18.583	6.78543		619	11.0141	74.0753
	533	-0.884836	4.95265		619	1.61431	60.2038		619	6.27935	44.0078
	533	9.50116	0.837368						619	7.80077	85.7071
					688	50.2749	40.057
	492	30.2441	53.0782		688	12.4688	32.4993		666	-0.173018	28.8285
	492	8.82664	19.6102		688	-0.0374722	10.216		666	24.3119	8.66818
	492	34.8703	21.3373		688	24.2621	24.3302		666	3.39156	22.2561
	492	26.1477	5.39209		688	0.406145	6.22451		666	6.37153	33.6541
	492	3.73574	9.51511		688	-0.31971	2.62424		666	18.0578	122.593
					688	-0.490724	4.08516		666	2.19	33.9813
	684	34.8163	70.7055		688	4.9511	8.82036		666	3	22.4404
	684	7.87233	61.6324		688	-0.558457	4.14969		666	7.07814	22.0414
	684	7.65197	70.4185						666	8	40.1365
	684	5.49751	24.1928		624	0.161114	11.0566
	684	19.5992	53.923		624	4.91299	60.1975
	684	9.23826	47.7882		624	1.49827	129.908
	684	8.67666	16.175		624	31.1062	23.1301
	684	5.24054	8.31015		624	3.01736	71.6047
					624	12.5247	50.5626
	639	4.75217	76.4693		624	-0.665129	50.707
	639	10.4769	19.2665		624	37.2996	11.008
	639	15.371	24.7981		624	20.3621	12.885
	639	4.98679	27.1359		624	4.58175	6.72999
	639	9.66138	20.8036
	639	13.8369	8.57333		657	1.86657	40.6305
	639	9.50486	24.2232		657	3.2361	83.2378
					657	4.10272	69.071
	596	31.9172	164.809		657	34.1823	11.4021
	596	8.55538	89.5656		657	5.10569	46.5717
	596	13.396	40.6009		657	4.36813	7.02884
	596	6.95601	119.215		657	4.97041	15.8993
	596	6.44204	109.996		657	1.59492	8.54636
	596	0.544304	7.74948		657	1.48073	10.7832
	596	5.53542	14.1792
					710	1.04884	42.4728
	579	0.540988	2.47077		710	-0.886456	107.567
	579	0.152724	2.38859		710	1.08108	9.84686
	579	2.97143	14.5503		710	8.8045	71.3137
					710	-0.0107652	34.4177
					710	3.85988	65.2139
	642	0.461786	41.6644		710	0.291843	17.3854
	642	4.65045	114.045		710	0.365175	40.1971
	642	4.32493	45.8026		710	3.38352	10.4777
	642	13.9968	31.6147		710	-0.240771	28.8083
	642	7.89101	27.8732		710	3.0711	22.2181
	642	1.18291	10.0197		710	7.2303	5.65864
	642	60.042	4.37585
	642	29.8089	4.98848		583	3.4412	34.9967
					583	2.81052	99.7989
	509	1.59557	13.3421		583	2.9109	50.3753
	509	16.1957	39.2193		583	9.54891	32.3947
	509	18.4669	49.5854		583	3.96878	19.2852
	509	16.3236	28.4817		583	0.282759	6.19907
	509	13.6289	24.6698		583	18.3461	45.5792
	509	10.4688	19.4835		583	0.198173	41.5892
	509	3.86681	21.6324		583	9.63753	27.0569
	509	23.9398	38.4446		583	9.67076	13.9433
	509	21.5197	26.0809
					701	3.10007	3.77205
	600	17.5196	32.4558		701	2.96745	8.33125
	600	4.559	11.9255		701	12.9148	8.33424
	600	10.7521	32.4527
	600	12.5127	28.3894		671	16.2739	36.6899
	600	8.83204	25.9818
	600	3.97992	22.8498		519	12.8425	78.3292
	644	34.9275	88.9768		648	3.00965	7.49487
	644	3.46835	33.9411
	644	2.5428	104.99		636	9.17272	61.3026
	644	20.5105	21.2547		636	2.41316	11.0153
	644	-1.23158	31.4953		636	19.2138	45.401
	644	3.03516	7.00254		636	20.0462	25.4179
					636	3.32263	82.7541
	564	6.54804	41.441		636	5.44149	13.7316
	564	4.78762	39.0911		636	3.08913	25.4009
	564	4.74511	94.0432		636	13.2064	35.1931
	564	3.16865	63.397
	564	4.23629	61.146		569	4.25231	46.0123
	564	11.718	53.1381		569	6.23592	69.3591
	564	10.6776	24.4646		569	39.9879	45.222
	564	26.8489	57.4071		569	4.49861	29.2046
	564	5.14445	37.963		569	7.35038	25.812
	564	19.4762	44.6063		569	3.77304	45.1061
	516	78.5725	101.563
	516	4.03306	177.065
	516	2.72271	96.6654
	516	0.769986	75.463
	516	11.7724	76.4193
	516	7.12183	34.8218
	516	0.838452	36.6596
	516	4.34754	25.8792
	516	5.85272	23.0657
	516	8.72222	16.6597
	516	10.0486	11.0544

## Sheet: Figure 1g
	Males	Females
	L2/3							L5
	Control		CORT		CAI			Control		CORT		CAI
	Room air	N20	Room air	N20	Room air	N20		Room air	N20	Room air	N20	Room air	N20
	7.33187	7.14499	4.30807	6.23254	3.63552	5.47591		15	6.75839	2.33319	37.9647	11	57.8106
	15.9335	3.39164	13.1903	8.31588	2.81268	5.15033		13.3818	22.3217	3.08085	26.5771	2.39291	63.6624
	7.22552	5.26579	2.62092	5.34493	10.0611	15.5982		6.98717	24.8021	3.1186	38.1109	9.79639	34.9278
	8.96159	4.79123	2	3.9	9.77609	15.5151		20.7649	21.7866	3.85006	23.6636	5.86567	40.8513
	5.21482	3.96893	16.3328	16.8582	10.8808	15.4632		12.3241	44.1432	4.10354	35.3985	6.8218	30.4926
	10.0835	4.77788	14.7013	16.1811	4.40732	6.25021		9.79857	28.7528	4.61741	31.6067	7.019	72.9552
	3.81665	3.82726	11.7855	11.9819				10.478	78.0165	6.08156	37.1218	11.3093	79.4334
	3.68427	4.31413	1.17739	3.54905				12	16	6.32745	6.81252	1.99988	62.4099
	3.0142	5.69511	10.6711	1.85236				15.2948	35.048	6.76751	32.5745	6.44469	43.5975
	50.8433	74.2749	16.916	23.1071				14.0006	28.9933	9.48819	37.5271	7.92952	38.7528
	2.54519	11.1955	0.780629	3.42437				9.69256	25.6758	10.1063	14.7785
	21.4738	46.0781						10.5421	47.9435	10.7087	40.838
	12.1118	18.4194						9.73508	51.6697	11.0164	43.4527
	25.2482	31.7686						12.095	59.3087	11.4799	42.779
	4.11463	2.68996								14.074	43.1658
	2.79167	3.0031
	41.4671	24.207
	34.4623	24.2698

## Sheet: Figure 1h
	Males	Females
	Rbp4			Tlx3			Colgalt2
	Room air	N20		Room air	N20		Room air	N20
	3.37057	103.861		8.4766	81.0278		6.26646	46.5224
	11.1481	88.5842		8.52886	69.716		18.3165	17.1464
	5.88056	69.823		6.97502	50.4241		3.06849	45.2135
	12.9839	77.4563		56.2141	24.3395		4.22469	7.07272
	33.8289	66.6857		9.4532	52.4949		2.14594	0.510108
	9.396	58.5897		0.302092	65.2816		2.00053	7.01589
	11.1753	31.4246		3.10529	43.1934
	9.50859	88.36		2.3332	52.9477		2.944	16.46
	2.15696	8.12502		-0.613128	33.2369		9.96201	14.1749
	5.53673	56.7135		6.44077	26.9103		5.90933	9.46957
	5.59968	31.6135		6.19489	43.5379		5.34875	1.29906
	2.46993	13.3951		3.36507	24.4382		2.17645	11.0485
							2.73898	1.36469
	2.47505	62.0384		5.68004	94.4147
	3.25616	70.6442		12.4743	47.4492		7.14238	2.36259
	2.02168	58.8048		12.6603	69.4143		12.7582	1.63467
	0.857636	48.6304		27.5033	49.6098		3.98757	7.38389
	6.4567	16.8889		39.6602	31.1558		17.2954	6.97162
	2.32843	-6.17968		0.788458	51.6241		7.07442	3.52906
	2.01133	7.74295		8.95663	102.362		2.83708	1.30117
				7.05111	45.4358		2.52924	3.11761
	5.34131	36.8325		7.68891	43.8095		2.54729	17.6974
	2.3273	47.566		17.675	52.1589		6.00008	8.19661
	5.59997	77.8738		3.83525	35.1354		7.34804	4.47626
	4.41686	9.55222		11.0911	47.5126
	22.4932	23.2462		9.75504	40.4012		6.78325	2.27024
	2.36056	31.2563		9.65457	45.9233		5.34656	4.43759
	2.79018	8.88628		10.5993	57.8494		3.05943	2.59625
	2.17076	9.47156		5.1409	51.5278		8.05229	55.4726
							2.93578	14.671
	42.1772	49.0895		8.71473	54.9066		2.24001	2.81946
	33.9501	0.621015		7.2135	96.9575		3.78641	10.0709
	4.49117	16.9941		17.207	131.874		2.18385	2.95824
	1.9369	1.9596		60.3599	98.0472		3.30052	3.62248
	2.93919	5.06698		8.64233	84.7522		2.72683	4.17733
				6.15844	53.2396
	36.3661	39.4422		15.6914	63.4492		3.3578	7.715
	2.72607	19.8194		8.43097	77.4885		2.51277	4.11928
	1.90513	20.4466		5.79869	62.3449		2.72903	10.4346
	2.08258	18.3413		14.2358	82.7982		1.25736	2.81461
				14.2433	75.3109		5.83848	10.2269
	2.85219	72.808		7.3981	33.4739		3.24373	3.6668
	38.0604	81.9442		3.68837	56.6766		2.51583	33.9364
	5.28232	89.6367		11.1879	38.5153		4.57128	2.40067
	4.96795	50.2998		9.76115	39.2997		7.70489	2.77896
	3.95934	40.2417		19.4439	44.5652		3.75645	6.66607
	3.39156	87.1802		9.10976	48.1242		2.13466	5.37063
	2.05858	49.6891		19.5221	37.0727
	9.45451	40.5638					22.5138	32.9996
	21.1431	36.848		6.66483	136.206		1.28274	16.7409
	8.06348	27.9846		83.5684	114.814		3.99211	7.83574
				8.95636	97.1774		1.01593	9.24446
	5	51.0033		13.8692	74.0769		2.7618	3.60532
	16.5538	55.2948		81.335	99.4902		4.78957	6.32603
	59.6739	42.6381		50.2414	112.689		4.94719	8.10417
	0.156315	33.1938		136.878	75.6883		1.503	2.20552
	15.8044	38.81		9.02901	91.8077
	5	7.15947		11.8921	148.823		11.213	55.7574
	9	25.5234		18.1642	116.889		8.49737	1.62254
	4.14594	14.6554		47.1183	96.495		7.28773	2.4796
	0.0281511	16.4624		-0.665683	52.1384		4.71546	8.06645
				4.3003	65.466		3.39923	2.58726
	3.02684	80.2047		63.1843	49.9851		1.22074	18.28
	10	92.624		72.9639	155.301		2.39804	2.27302
	3	37.7912		8.59491	81.0613		2.52869	23.6273
	29.0746	72.1795		23.7902	67.6861
	14.0374	56.926		70.3537	96.7448		6.75713	2.09706
	15.7789	127.864					4.36306	2.84715
	62.523	87.8348		7.90695	47.922		2.89764	3.53429
	5	39.0989		98.481	143.775		2.46176	2.89019
	3	25.0522		30.6843	80.2218		6.21225	4.57377
				14.6167	23.9601		5.9806	3.82489
	10	19.1209		85.5792	84.2122
	7.48785	48.5159		-3.29802	25.7459		2.11487	2.53976
	3	20.9971		58.2011	64.4916		4.12749	2.44801
	7	10.4013		37.3946	83.6408		2.1648	4.72614
	5	27.3568		64.6675	45.1877		2.81127	1.99786
	5	18.1712		74.7959	86.7726
	8	10.2846		20.439	53.5966		10.2116	23.0994
	3	31.8144		45.7592	53.7413		4.20694	2.23006
				-3.0401	88.8785		5.74743	18.5859
	1.16415	138.795		18.4361	39.9964		2.23001	2.08628
	1.31744	35.2826		1.33965	60.3187		2.5419	2.31461
	25.0048	70.7991		8.84983	34.4587		2.47999	11.2031
	11.8957	53.6353					3.07691	3.61154
	4	38.1964		19.1889	129.037		2.21594	2.51344
	51.7315	52.7724		38.5486	95.9173
	3	39.3619		4.27997	38.5139		4.17723	15.801
	2.4704	13.0465		10.0694	42.3368		2.85861	13.5218
	8.28136	31.0288		3.2998	43.8297		14.0347	3.10981
				3.93794	20.2945		10.0547	0.793551
	1.94552	57.2887		3.0024	50.277		2.95464	5.82602
	16.0146	103.09		35.0917	10.1526		1.2925	2.34465
	31.3506	65.4859		44.5668	53.983		2.57265	2.90022
	4.5143	51.7208		2.81254	21.4039		2.74364	1.19769
	32.2867	89.4793		6.5087	35.4282		2.39603	5.34865
	7.70589	65.1079		2.82036	9.12824
	23.7434	74.6658		9.38977	14.3593		1.01205	9.78739
	12.1708	41.2059					5.19193	3.88502
				1.85434	63.0508		2.72042	4.17384
				3.07594	63.8371		2.47645	3.48238
				3.01772	51.5648		5.75398	3.40353
				13.5116	57.8843		17.0638	31.533
				3.39173	49.9228		4.29764	9.3953
				21.8951	75.5377		5.1245	6.21946
				25.0591	62.4837		2.36588	4.11713
				3.67406	20.5785
				2.50666	30.5721		2.46818	2.94661
				18.1237	24.3975		2.64165	2.96031
				5.47574	35.5564		2.19915	12.3702
				9.11665	59.4427		3.26559	2.27116
				3.23082	40.5521		2.47973	4.55465
				25.0768	32.1273		3.36543	2.28095
				71.2279	110.236		4.25334	2.2403
				10.9497	52.2682		8.99049	3.26702
				10.4428	57.8307		3.34669	3.9055
				22.883	66.7149		4.84964	2.89698
							5.4051	2.93004
				60.0051	144.761
				57.7885	142.275		7.63621	3.03819
				51.4119	105.011		-2.70073	1.63552
				3.45512	77.0938		15.1072	38.1843
				2.80545	21.1697		3.70759	5.6479
				4.46371	56.6786		3.38896	3.178
				3.56239	24.744		-0.256501	3.28494
				4.19876	44.6353		10.915	3.29799
				2.74008	37.6342		10.4579	3.89013
				2.01151	19.4157		10.4579	3.89013
				10.2585	116.585		4.21513	4.78802
				14.9942	20.3763
				3.55881	53.1024
				3.11251	52.1027		0.109649	7.14879
				18.4623	121.204		13.1424	4.42221
							23.0623	0.0195428
				17.0179	87.1905		5.74359	5.39531
				2.88968	8.32502		12.3165	7.51028
				-0.609591	24.128		9.65566	8.40482
				0.339968	18.4955		1.83578	-1.35598
				13.6994	57.6384		9.94187	6.45224
				-3.05906	33.7493
				21.26	9.11574		25.6779	20.8023
				-4.71901	7.83579		10.0162	13.2
				0.884323	33.0836		5.65228	3.09048
				-5.03171	8.11598		7.12724	3.61641
				-8.48428	17.1684		16.0102	12.6462
				-2.33549	12.3656		6.82614	3.09514
				14.2416	16.8365		11.373	4.09355
				1.4936	11.4529		6.98782	3.04291
				1.10596	6.82708
							13.9779	8.93706
				1.20874	112.591		29.8185	3.10687
				4.44913	38.0385		16.9711	3.21294
				8.37562	56.1076		20.2776	6.60598
				-1.18362	47.8415		14.5917	2.99416
				0.700725	44.372		0.67292	5.95665
				1.69543	47.1247		8.79961	12.9657
				3.79838	23.1372		2.77756	2.94051
				-1.43853	19.3475		7.38286	2.78315
				4.19947	54.1777
				3.00654	44.0411		18.3703	20.9534
				3.8844	32.76		25.3622	6.92504
				7.28336	22.1396		27.1124	4.44931
				1.17178	20.8949		3.89382	8.31531
				-0.420962	26.5294		3.95257	3.28515
				12.5781	46.4382		19.5038	1.77281
				4.05463	5.68129		6.38667	5.55564
				0.141117	23.6744		4.86658	5.90938
				3.5517	64.3028
				4.31379	10.9593
				0.780842	26.0515
				3.24032	36.1696
				7.43662	134.919
				25.1551	81.5276
				4.4347	30.6052
				80.1692	17.8076
				4.08196	15.5044
				2.8325	32.3577
				10.8268	26.4683
				6.70799	31.1679
				14.6005	22.5219
				6.46762	22.9903
				0.651439	16.5765
				1.78134	24.0797
				21.1964	19.3736
				4.91991	12.7366
				5.28193	10.0381
				0.526973	37.194
				-0.662553	14.5358
				2.65602	24.651
				5.79977	20.2859
				2.86327	47.7685
				3.93589	40.9335
				30.8033	38.41
				7.00626	36.152
				-0.645536	20.4779
				0.504516	21.8049
				7.29435	16.1736
				1.47335	22.9993
				0.346095	13.3343
				23.4845	25.2683
				55.7517	17.7723
				3.41244	6.73627
				5.25202	17.7356
				7.73454	19.6648
				3.88145	2.99904

## Sheet: Figure 1i
	Males	Females
	Oxygen (%)					Nitrous (%)
	0	25	50	75		0	25	50	75
	18.3249	18.8693	13.623	4.12504		4.84111	13.5054	7.3083	8.0136
	21.9897	12.7409	9.18342	13.3517		7.37964	15.502	20.6853	22.0635
	14.7065	31.3507	15.3912	44.0722		8.42649	21.8114	48.9231	40.8864
	11.347	14.1815	8.50865	13.118		10.8075	29.8908	31.2592	22.8238
	24.6765	34.4341	26.4025	15.7081		19.4469	32.9025	34.6796	31.2215
	22.4971	12.4011	17.5784	18.296		24.4749	53.4681	61.6667	30.0847
	9.1328	10.7235	12.6855	12.363		11.8109	33.3186	25.8881
	2.46214	4.49402	10.7784			9.46748	8.94347	60.1348
	17.5789	3.77968	5.83685	8.93681		7.33228	22.9461	81.3351
	14	6.3776	7.9537	9.97978
	10.4695	7.37148	5.10605	7.51648
	16.1776	19.1327	11.4224	15.0757
	8.3216	2.73877	3.78427	2.21113
	9.94987	8.90821	4.17814	4.08024
	7.64565	6.62939	6.2184	8.98919
	8.21827	7.72485	4.7454	11.2736

## Sheet: Figure 1k
	Males	Females
		Rbp4/tdtomato
	Baseline (BL)	221.1	129	127	215.82	198	211.86	203.94	184.8	115	129	132	148	155
	Post-CNO	225.06	214.5	222.42	204.6	204.6	217.8	207.9	194.7	85	135	152	136	137
	Post-N2O	84.48	71	177.54	130.02	99	191.4	174.9	145.2	162	119	203	113	80
		Rbp4/hM4Gi
	Baseline (BL)	113.52	75.24	84.48	166.32	156.42	139.26	94.38	87.12	192.06	226.38	231	166.98	60	69	111	151.14	135.96	147.18	187.44	143.88	126.72	114.18
	Post-CNO	141.9	95.04	117.48	218.46	189.42	135.3	158.4	178.2	193.38	223.74	217.8	221.1	168	173	180	129.36	158.4	150.48	152.46	117.48	167.64	163.68
	Post-N2O	169.62	203.94	180.18	221.1	210.54	208.56	166.98	174.24	227.04	233.64	227.04	223.74	178	159	174	133.32	81.18	130.68	129.36	149.16	180.84	190.08
		Rbp4/hM3Gq
	Baseline (BL)	136	166	80.7	119	109	99	89	96	124	101	148	156	99	100	147.84	113.52	55.44	173.58	105.6	101.64	186.12	117.48	198.66	114.84	215.82	135.3
	Post-CNO	52	125	49	76	19	4	25	14	56	16	37	41	11	7	120.12	112.86	60.72	129.36	88.44	110.22	162.36	89.1	106.92	114.18	182.16	14.52
	Post-N2O	48	78	147	77	4	82	46	11	67	26	45	27	35	33	52.1788	134.16	100.987	112.316	3.68147	84.1867	96.1969	72.2012	107.34	29.5628	202.331	55.35

## Sheet: Figure 2c
	Males	Females
	L5												L2/3
	Control				CORT				CAI				Control				CORT				CAI
	BL	N20	1 hr		BL	N20	1 hr		BL	N20	1 hr		BL	N20	1 hr		BL	N20	1 hr		BL	N20	1 hr
	4.31137	38.6859	29.5853		5.16089	55.003	8.2256		14.8216	11.0309	21.3833		35.3151	124.458	13.0971		2.45535	16.3724	74.5396		3.51449	8.86643	11.1441
	54.9413	39.8558	4.80865		8.49364	84.8741	5.06925		27.6197	116.505	41.7239		7.50269	129.267	14.3061		1.92526	0.322843	37.3043		5.53483	5.67434	1.27834
	8.65269	15.0273	7.95531		3.08466	56.4861	3.93662		3.94285	74.3311	20.1445		7.25957	2.57619	7.53897		6.44398	3.60668	23.7105		2.79129	5.36315	5.62295
	3.01689	44.9569	4.68784		0.802493	21.999	3.65116		18.2741	46.2967	41.1895		18.1308	20.5919	3.95835		3.13362	4.90787	33.9618		4.15757	2.08276	-1.41308
	2.38463	16.7946	6.61722		19.7237	61.4793	18.3019		-0.858134	20.1318	22.755		4.57437	4.03941	8.75522		2.25303	7.77895	18.0422		1.89346	5.712	2.02115
	17.7678	7.44788	6.49767		5.9166	48.4666	15.4912		-1.5844	7.93088	16.83		6.4714	4.61346	11.8951		1.19713	2.70529	3.51873		5.0676	6.69902	2.46056
	6.77039	7.83284	5.68995		5.04174	77.8244	25.3434		39.5196	190.095	8.10346		27.026	6.68662	63.8465		1.59309	2.86301	5.32988		4.36712	4.73809	2.71928
	13.9779	24.3716	9.40599		6.45569	45.1703	8.73348		34.6899	51.332	1.66182		40.8574	14.4107	16.9679		1.02735	0.358165	5.96037		2.36491	5.75764	6.62244
	3.92166	7.27792	36.1799		1.64947	7.07218	6.51442		0.106095	29.7714	0.745823		20.4161	33.8175	7.79785						3.02842	4.38975	4.54448
	52.0097	58.4132	53.1255						4.18266	30.6814	18.4592		17.0172	5.23617	12.9889		113.282	3.35214	74.0398
	10.2557	38.6283	59.7012										36.004	7.11684	7.92423		2.32654	0.988849	19.978		2.77673	7.47351	7.64495
	5.55405	6.43228	20.374						1.11822	9.18686	8.19197		17.3012	7.83625	15.6462		43.1974	26.0892	24.118		3.41144	3.62439	2.92919
	11.6129	19.1876	50.3887		15.6678	68.6396	43.55		10.5192	123.274	47.858		16.7295	13.5071	14.1243		4.50332	6.37888	9.49356		6.32045	3.53503	7.3078
	16.3933	6.7452	19.624		0.879658	57.7499	43.3861		2.18096	163.584	71.5866		11.8102	3.50995	12.8822		8.6616	8.68899	4.45457		3.31967	6.47239	4.29731
	6.6608	13.1006	17.0997		28.0762	79.9506	17.8799		0.471132	18.1872	22.3469		19.0297	26.9762	15.1235		2.53662	2.03781	3.26737		1.96614	4.36238	5.21017
	13.3341	10.7562	35.8929		1.05184	82.4565	56.9295		-1.08734	47.231	32.2946		2.77723	3.98337	3.74004		3.82065	0.969299	4.09431		1.36155	5.83422	8.47454
	6.20052	98.6687	11.4849		20.6536	44.256	28.1126		0.608186	27.4534	49.8563		6.3789	2.52358	18.2637						2.20454	5.0648	7.8083
	7.07104	49.9296	13.1434		-1.42538	50.6324	31.5586		5.38718	147.862	10.081		4.39706	6.13026	4.21625		1.08572	5.25898	6.24929		3.21168	5.76616	5.96621
	5.47748	27.5033	10.3908		10.397	36.5793	2.64685		3.636	38.4339	11.0193		2.97295	4.22817	3.06936		4.56878	5.50379	7.54403		3.36582	6.02886	4.33709
	31.1709	24.0889	11.899		0.225574	54.8212	12.1696		1.31997	37.4568	7.72516		9.79934	2.55402	9.55307		5.54661	9.0387	5.4033		1.561	2.71379	4.90203
	14.1385	30.061	28.2753		1.39968	88.4982	4.5304		-0.224448	23.9541	13.3799		3.03077	3.75895	6.24362		1.35752	2.90284	0.870942		1.44047	5.77812	3.23615
	2.53749	77.3136	50.0968		51.7737	9.84651	38.1031						3.03077	3.75895	6.24362		2.45771	4.01967	2.4984
	1.71813	82.4434	41.9672		4.96322	29.6988	9.60299		10.6979	21.3347	45.5983		1.92949	3.03765	2.1151		0.791882	3.64977	3.91109		13.7312	20.7638	37.956
	1.24267	60.4643	44.0888		0.578004	44.6454	58.4203		9.37677	17.346	18.5086		7.16699	4.18632	3.27684		13.0836	0.194029	13.7843		5.74097	12.2759	8.9528
	5.03626	20.6689	45.3824						10.0141	55.0607	9.09825		3.24381	2.00715	3.57767						22.7475	19.7741	38.2975
	43.9835	16.8635	44.5332						9.38866	24.188	13.0677		4.47273	3.61684	6.02993		78.1807	12.8104	20.0431		7.52981	14.3419	7.52609
	68.5778	16.2217	21.9206						5.97803	23.4845	31.6852		8.33378	3.97181	12.0347		3.32326	6.93605	9.76868		6.43779	11.6042	11.923
	3.73472	13.1128	20.3458		2.66338	52.5754	48.0126		13.2451	67.3791	7.17341		9.20918	4.25985	9.56287		1.01636	4.37082	1.80821		9.57213	21.885	45.4552
	6.75361	11.8103	39.1902		18.8503	96.9913	6.79129		14.3736	32.6174	111.435		7.22005	9.19939	13.1367		3.00011	3.19733	3.58966		9.46054	11.0287	7.50761
	5.30485	12.0412	8.72606		5.17427	44.858	63.303		5.29699	38.0121	11.8928		8.05546	6.56468	2.49699		34.6981	5.02039	3.37871		5.26901	13.1119	4.81111
	3.47408	10.5028	6.69433		1.74945	70.8126	1.80387						3.48624	1.85813	2.60312		23.7908	27.833	0.981492
	1.27962	15.0918	10.4059		6.21905	69.5815	2.48794		4.96572	83.5855	16.3032		3.64667	4.62923	2.51565		10.7056	14.204	2.61672		6	8.60791	45.4387
	13.0584	30.594	30.3047		39.5795	81.0583	44.1834		8.0027	104.614	12.0968		6.5928	4.27248	4.98463						4	75.2728	69.0289
	4.22379	18.6356	12.2804		61.2914	71.7528	67.9674		1.23516	17.2004	4.78604		4.48398	3.80533	5.07011		6.95999	2.2027	11.162		20.7227	12.9442	14.5664
	68.6119	75.142	60.0798		3.51475	61.1395	52.4345		6.00295	15.8379	10.5663		1.49749	2.18741	6.93737		6.22427	3.52782	12.3738		15.6067	8.73266	34.0162
	3.5412	64.8199	10.5035		7.34687	36.4928	8.39742		3.93271	29.028	104.159		0.263447	3.56749	3.10842		2.33512	5.56494	10.0621		2.08543	10.7925	36.584
	68.8939	52.9397	11.1804		6.08254	15.6289	6.1596		9.55665	77.832	12.196		1.26444	1.62329	0.344067		15.7976	10.5514	32.1402		2.10128	1.35674	12.7316
	5.41227	51.5193	8.22908		23.1386	22.3811	43.4494		3.41961	11.3915	12.4565		26.013	4.45825	17.7572		1.28931	1.37547	3.43393		0.213442	0.191622	17.0247
	1.04707	26.4587	8.28289		24.123	71.1422	52.502		9.20091	9.49806	15.5385		6.67221	4.19978	6.71265						-1.26064	3.23947	12.5766
	3.35796	11.0871	9.81639						6.47459	18.6743	5.04625		49.8664	5.84199	76.6855		3.19598	3.11676	15.0239		37.8219	29.0313	36.3088
	10.5829	16.3434	20.5472										8.73184	4.58897	9.12498		5.41592	6.39642	30.9437		10.5973	16.1084	8.94673
	3.19938	8.82835	10.2064						8.91306	66.2741	32.1349		5.23154	4.70632	10.4218		16.8038	9.56438	21.1138		9.64892	4.38824	5.71937
	7.88471	12.9125	33.3379		20.6809	45.3367	1.53802		15.0083	15.1933	18.725		8.4768	4.66134	30.3285
	17.6755	33.8687	18.4464		20.3143	36.0746	19.8241		52.325	58.926	33.9463		4.5094	5.77392	5.92207		12.6205	14.4263	26.2554		-1.82407	-0.0964109	11.4904
	39.5359	66.8902	17.6983		45.5717	59.5369	38.1882		6.68642	11.4478	18.6606		8.29122	7.97875	29.2942		2.46237	6.872	2.68771		21.3224	35.7916	60.372
	35.2988	61.8458	16.3274		31.825	39.0396	33.8864		7.38946	18.9168	8.0741		14.1845	5.59188	26.9628		6.11016	3.88366	5.09095		0.174988	2.302	20.7212
	26.9686	24.3725	5.95913		8.70582	28.7207	28.5441		2.50535	10.3795	8.87606		3.6173	3.70372	32.446						7.99921	14.8909	64.1336
	16.2294	11.8158	2.54232		15.9389	32.314	2.76103		7.14341	22.6618	12.6329		4.79055	5.2428	5.00614		2.6731	14.0688	36.4221		19.3608	6.72659	61.6719
	52.3876	51.9905	65.1615		6.19403	8.31818	3.81119		2.48926	17.8933	8.198		4.82153	6.48256	11.0127		5.32821	5.51768	27.6516		28.2547	16.078	65.7586
	14.5057	30.0052	8.63697		0.384368	0.878382	0.797202		6.26088	52.7408	6.5938		4.36647	2.51555	10.9148		5.08905	9.47725	12.6376		7.6247	14.3972	35.8465
	36.6632	56.517	19.3926										2.38753	1.17338	6.94657						-0.195509	13.9227	25.0913
	7.16732	27.9288	16.4004						21.2774	79.5077	98.651		3.99668	3.8236	13.2653						1.35493	16.1734	9.43806
	3.24947	16.8416	25.9641						0.00238095	82.7125	12.9431										24.7354	34.4461	59.1251
	21.2755	58.9725	6.95599						-3.29655	20.3844	16.0113
	32.6337	72.6278	9.86557		2.51542	27.6742	-0.805179		1.21656	45.1028	13.5404										15.0763	14.5821	26.5085
	25.9923	43.6189	17.7186		37.399	20.2712	2.51367		-0.407918	88.4256	15.5847										4	3.7554	44.1512
	29.3	15.3465	10.9159		7.57454	22.5924	17.2239		27.4885	79.8346	131.695										30.3894	7.14327	37.387
	30.9192	54.3309	46.5543		37.2957	9.01086	2.55096		6.05923	39.5271	30.9454										-0.32319	6.47578	39.1299
	39.8862	67.9793	26.8775		0.33421	11.5486	1.3074		49.4613	108.137	38.6059										5.24452	21.4706	34.4733
	13.4709	40.2033	28.8441		6.93049	3.92943	36.8988		12.6309	49.3258	12.0308										-0.934258	4.26678	26.3946
	12.2447	63.2443	4.89611		10.9635	3.79864	39.7324		4.71812	73.1381	22.7641										3.1685	6.77688	24.7771
	26.3615	51.4109	61.2524						-1.2388	59.0682	48.8785										-2.86669	0.0155848	19.8911
	5.46093	17.0067	8.42815						14.2405	103.818	70.1357										-1.8652	-1.89901	25.158
	17.6603	13.5931	8.37474						6.55666	119.436	18.3705										-0.501603	7.38628	52.4032
	3.88174	10.8937	5.60349		5.56167	24.3424	45.7517														2.44943	2.74176	34.4667
	22.048	91.1852	3.39864		1.70286	4.14478	6.12278		21.3065	74.6811	54.7576										-0.949437	2.28711	38.4261
	12.2481	23.2512	27.2507		8.57266	9.79697	15.8518		43.2158	23.899	27.7398
	2.11563	14.8859	2.30124		1.32955	6.72934	16.6301		-2.31816	174.861	11.4675
	17.9664	38.6109	19.5581						3.3734	98.7532	57.4423
	4.65217	78.6213	12.3205						8.2061	88.2508	25.1306
	17.8498	30.7764	38.1173		7.88705	27.2753	8.29749		-5.92755	16.1549	30.0977
	11.2973	27.2404	17.5534		8.75569	19.1084	13.4711
	5.62185	10.6581	13.1077		11.4627	35.3537	14.334		0.893626	78.519	122.955
	4.87657	6.64634	4.94918		6.94484	12.748	5.31722		3.20054	68.4717	48.1107
	7.61921	54.6251	31.8101		9.36409	19.688	13.2557		20.8147	20.4014	59.6043
	12.0462	9.78165	12.944						11.4243	26.8756	61.4093
	9.13759	31.1928	18.686		1.32317	6.63133	16.7366		0.0530739	13.5552	67.4839
	8.58935	38.6212	13.1088		4.82473	6.23242	15.7277		-1.54253	25.078	113.422
	6.88109	8.14274	16.8404		6.10864	7.82559	16.3888		-1.44087	53.5697	52.9011
	39.9325	87.8506	44.3192		1.08004	10.5739	20.6695		-3.97167	74.574	145.472
	8.30189	16.9001	14.2404		7.11228	8.62975	38.1565		-0.187332	71.3506	83.0461
	7.24833	7.37929	8.41887						-2.16075	39.2538	59.7217
	12.432	12.1426	4.31018		3.14447	34.1217	14.9025		-0.621331	254.698	20.0224
	16.144	24.721	23.7149		-1.81623	1.71088	14.5264		-2.46317	22.572	75.2202
	9.41444	17.5922	10.5743		3.03503	2.91069	12.2579
	23.4653	23.8841	17.594		2.67268	6.20702	4.86884		-2.69052	8.3894	56.9882
	20.6544	55.7429	25.3935		-0.661543	1.87554	7.90935		-0.0785278	13.265	4.56889
	15.3063	29.2977	17.8515		7.34151	9.18152	4.02411		22.7513	31.2908	78.3651
					0.45691	4.44191	3.48561		0.189004	11.8293	55.6648
									3.10515	129.001	67.8018
					16.5028	7.9853	50.7649		38.5674	14.2912	66.9455
					-0.342549	7.30739	13.099		15.6097	24.4632	32.2734
					8.47635	7.16539	34.7785		1.1114	43.2525	72.4794
					1.35348	9.23929	13.7454		11.0141	74.0753	23.9977
					15.7772	27.3047	5.30713		6.27935	44.0078	11.1812
					1.08591	20.7031	6.81115		7.80077	85.7071	16.5218
					5.86204	14.331	9.16679
									-0.173018	28.8285	7.83139
					9.42489	10.5766	7.81798		24.3119	8.66818	116.571
					1.8433	44.6222	13.1504		3.39156	22.2561	92.8357
					19.6008	33.2533	9.17061		6.37153	33.6541	32.8792
					3.74362	11.6281	8.72567		18.0578	122.593	77.5009
					-1.11897	11.6007	9.10009		32.194	33.9813	38.4576
					7.511	20.1431	18.0301		30.9295	22.4404	120.621
					1.66938	31.5466	7.64998		7.07814	22.0414	99.6918
									38.0746	40.1365	66.3776
					6.01883	78.3429	12.0347
					11.908	49.6223	21.7397
					7.70241	130.205	12.937
					20.8418	58.4248	9.03889
					16.7738	33.1274	11.5735
					5.37906	38.453	91.7949
					41.4801	155.971	72.6159
					8.8056	55.7499	14.3055
					18.2429	88.224	9.76417
					3.68334	25.5606	42.7212
					20.6892	61.4193	9.8319
					3.10702	95.8152
					5.80092	70.0178
					6.65711	44.9059
					2.75196	57.5733
					0.48415	28.4048
					7.11947	57.3877
					3.7153	64.11
					5.17006	28.7248
					7.43717	58.3161
					6.72857	53.3847
					3.40443	50.4328
					6.99886	109.408
					6.88342	43.204
					7.42082	42.3862
					3.29247	74.684
					2.43616	51.0298
					4.72621	52.7861
					4.69419	30.8937
					3.73819	18.19
					4.44846	21.4296
					5.86133	17.2609
					1.18067	12.0293	64.9606
					6.29656	23.4125	48.9317
					9.97039	83.0867	30.3749
					4.11038	85.7047	53.4743
					0.598621	21.5215	69.376
					5.34557	63.666	97.4043
					8.11109	61.4147	75.5698
					9.8956	21.6164	56.8785
					6.76594	31.1828	85.7678
					8.26969	30.6541	65.9618
					8.05063	28.8614	56.9075
					11.6807	22.2619	70.9989
					0.926051	24.6665	54.4694
					2.71013	22.6272	39.1074
					8.54413	67.0954
					5.87105	59.7783
					8.60233	33.5955
					1.61847	25.6521
					-0.0490182	65.2271
					9.02487	33.4864
					7.71906	39.0862
					7.12066	42.8966
					6.53898	52.5574
					4.08177	34.135
					1.02085	110.459
					-0.271413	57.64
					1.38527	108.22
					2.77251	77.4967
					-1.00086	96.6522
					17.7452	76.3654
					6.31557	102.249
					-2.06491	45.8247
					-3.62127	100.482
					-5.42977	76.4187
					-2.5504	71.6651
					4.75953	117.768
					-1.54228	89.7735
					6.99038	36.9019
					3.44923	104.295
					11.0381	46.3961
					-1.45562	67.1123
					15.2236	39.1274
					5.50973	44.8581
					9.88847	33.0273
					4.66612	31.764
					9.80053	50.8534
					2.6898	40.3631
					4.78249	40.7559

## Sheet: Figure 2g
	Males	Females
	L5-hM3Gq			Ipsilateral L5-hM4Gi				Bilateral L5-hM4Gi
	Baseline	Post-CNO		BL	Post-N20	Post-CNO		BL	Post-N20	Post-CNO
	14.5607	159.478		9.80841	23.034	1.99759		32.1485	41.4832	44.4642
	4.31231	72.6456		34.1487	45.381	2.41544		16.3965	52.5762	16.3418
	41.4506	59.1716		46.9017	25.5218	3.90885		28.9143	31.9938	17.357
	35.0368	67.5834		12.3632	19.0268	56.4707		20.9097	25.2273	11.1272
	99.0707	119.958		6.00839	16.1219	21.9924		45.761	30.401	13.5547
	12.0833	27.5364		25.2084	102.185	141.976		27.0055	29.7188	3.61143
	21.2378	63.6522		5.25508	15.6055	20.9675		10.458	19.401	-5.89349
	12.1352	68.4929		-0.465717	20.3947	-2.31063		9.95277	24.8622	32.4532
	12.4533	42.7142		17.4035	33.4089	30.9273		19.1535	41.3425	10.4926
	27.3126	63.2528						11.0788	41.9915	0.0189312
	5.99448	88.0697		46.5049	89.8002	114.726		13.411	16.8917	8.41701
	12.3607	30.9262		24.3665	36.8665	24.5985		21.3809	32.3536	13.8131
	15.0361	87.3177		5.27207	26.3245	5.01383
	76.106	80.2631		13.7025	30.3248	5.7464		34.7007	64.324	25.8745
				2.29536	15.9687	43.6911		28.8422	20.6838	19.9698
	14.5945	90.9787		12.2555	9.91063	8.16623		11.2755	58.7084	19.2062
	12.2483	73.2791		1.63298	12.5059	0.577264		17.2153	29.4978	16.4094
	9.85093	29.4114		15.1471	31.6716	28.9314		6.28937	27.5584	13.7815
	11.1678	134.878						12.6011	36.5089	22.0691
	11.1373	69.9615		-1.89362	17.2465	4.59181		38.9987	49.2008	85.0851
	14.5483	31.1441		12.0009	22.3933	39.8367		4.10677	30.7859	16.3551
	21.9109	71.479		24.8051	46.6442	27.6348		30.7532	23.7643	0.484654
	117.589	98.7705		8.56738	16.27	10.3165		10.269	20.3099	24.7006
	15.0743	183.62		129.411	105.804	132.481		19.5052	36.1342	24.3936
	46.1919	62.9738		7.25565	17.894	17.9926
	20.8474	30.2737		30.0244	37.7087	38.8089		25.9292	58.3332	8.8351
	8.88754	38.1375						8.28284	74.4263	47.7249
	15.1171	39.1748		6.80171	93.8927	23.539		41.7254	53.181	29.9707
	16.7742	45.2959		24.723	74.3636	18.2084		28.7762	25.5704	4.8661
				9.81701	62.8972	11.7905		9.33072	46.9116	25.4175
	26.8624	65.0163		1.82843	48.2781	49.0584		8.32652	31.0921	19.3643
	33.5275	27.0774		7.02762	37.9904	15.2621		10.5172	45.8944	0.724075
	20.28	26.0864		5.55398	66.1637	24.8939		13.5619	11.7018	24.4348
	50.0102	65.8435		7.23818	19.9787	4.9025		4.95798	17.9045	5.93291
	20.1479	60.9531		8.99856	57.652	21.0935		29.3458	35.1223	13.4138
	83.7328	63.5427						18.0754	40.0138	18.0684
	14.4184	54.8091		37.4402	99.6473	9.10579
	17.9286	17.6464		45.0614	76.9352	42.5331		16.2941	3.30859	2.98184
	10.6257	46.0653		6.01792	54.5954	12.544		9.31008	1.12286	-1.32487
				11.1724	50.2541	16.3222		-1.27543	0.984902	3.10684
	85.7479	84.3243		23.1468	33.2254	30.5829		-0.628197	14.2894	1.84205
	53.1523	71.2703		23.466	79.5237	32.8512		7.3484	28.953	-3.223
	123.904	68.1183		23.1712	51.4703	18.802		-4.52606	1.65815	44.7094
	19.9155	42.4573		11.6526	28.4927	11.1797		1.60847	10.7368	-0.14642
	59.2405	54.9913		21.0126	26.6245	28.7756		4.88164	33.0766	-2.84175
	12.8492	23.1359		22.4601	55.641	22.5218		4.12663	11.7663	5.63801
	30.6024	23.8094
				29.4003	54.5025	27.2258		7.55546	9.27383	6.05287
	2.98545	77.9513		16.2139	21.8625	10.2013		8.12195	6.09719	3.36833
	45.8304	45.3177		19.847	26.6565	10.4961		1.78712	0.68251	3.12354
	8.62871	13.2374		16.8777	38.2204	19.1545		8.11992	10.6081	0.618651
	14.4237	19.5732		8.14148	27.9298	14.9333		58.2664	69.224	5.18639
	4.94637	3.90316		13.2474	25.268	1.8645		5.59208	8.37355	5.42491
				4.12192	32.9509	8.96845		5.41093	2.8215	1.34851
	34.1008	92.6879		10.7543	29.3065	10.0635		13.5505	15.2972	3.58903
	12.722	63.0933		21.2102	13.1983	28.026
	38.2219	87.7979		28.2904	46.7522	43.1542		12	57.2957	2.3462
	25.4113	87.0425		6.2008	25.7123	21.3672		15	22.827	8.90556
	19.2749	85.9622		20.611	26.9298	31.2754		7	28.1497	2.8445
	5.3484	19.6585						8	11.8802	2.07005
	25.4409	32.5727						14.3924	7.4267	10.6788
	9.91809	23.7501		7	86.086	30.5414		15.7466	5.92652	4.65229
	80.1165	65.5024		5.51255	25.1901	4.18624		35.3936	12.8931	8.63356
	5.61334	83.0935		4.8653	28.1881	2.73119		21.8442	20.9141	5.73299
	12.7019	46.4979		14.2301	19.1626	4.45832
	27.9823	45.8427		2.4958	2.64702	1.00869		5.48572	63.7262	9.45423
	14.5247	24.8335		7.95158	1.71653	2.22173		6.808	3.63134	2.09683
	13.5531	48.3773		23.0188	6.29308	4.91442		7.83687	15.9042	15.6835
	7.00752	65.122		4.01078	7.26572	47.7065		9.28806	7.26401	10.3697
	87.1215	85.0168						6.60705	1.07891	8.39262
	6.62831	42.3635		1.74007	5.05269	3.8841		7.20514	18.3209	9.19938
				5	72.8542	3.11849
	9.17916	68.1732		10.015	2.06053	1.9842		6.30361	13.4207	-1.82277
	5.61391	79.0872		1.63537	13.0844	3.72565		7.91424	28.0509	10.0993
	6.03407	50.3462		4.0524	0.439406	2.10193		43.2433	9.58687	16.1835
	8.2704	126.423		1.32357	0.918043	3.0072		8.29322	9.83404	-1.88525
	13.9439	69.405		0.580054	6.67648	3.85277		11.0184	2.95532	12.152
	9.27489	52.1727		2.4465	7.62664	3.67724		15.3545	12.7696	6.94536
	30.9235	18.9954
	5.55789	58.1793		1.2513	39.9758	40.0154		4.87812	15.9372	4.66579
	7.74116	74.4688		8.4401	51.2537	22.0958		-0.3106	3.0241	6.87731
	4.62953	87.466		22.8624	31.4456	11.8342		-0.825154	14.2306	9.33299
	39.0738	67.4754		15.1068	32.9075	7.98427		2.41915	12.5315	2
	11.0336	169.041		10.2603	13.1239	2.00216		6.6245	5.60075	9.59317
	5.30336	78.8648		30.9392	47.3996	27.4422		2.5572	10.2648	6.49385
	65.3731	95.5962		24.3824	50.3788	5.8174
	61.1108	85.2607		21.1681	25.6447	3.42911
	6.50991	51.2509		4	28.7822	14.2995
	40.6698	38.132		12.5433	22.0664	9.37123
	6.06859	61.2166		14.02	26.74	6.00692
	19.2941	30.6739		11.4191	15.796	8.35057
	7.80205	33.5936		4.8416	24.9076	5.27582
	13.8198	79.2694
	9.22246	30.0411
	3.39878	25.5726
	5.70049	24.5803
	17.9222	35.1371
	9.18615	70.7607
	23.8145	64.9481
	10.6844	155.279
	13.704	62.5947
	18.4544	26.9765
	10.0286	46.3867
	14.4586	27.3401
	8.42735	45.6368
	7.67038	38.5341
	19.4167	34.2626
	13.1401	32.3695
	11.1459	46.0477
	33.2251	105.701
	9.08538	20.8805
	12.281	32.6239
	14.0069	14.9553
	21.4829	27.6157
	61.6015	51.4835
	13.9521	79.7249
	31.8481	43.8205
	8.70914	97.9441
	18.4846	62.274
	20.0692	27.2542
	23.6715	20.7111
	15.1032	44.6378
	17.2341	24.4006
	21.5379	32.2542
	23.6485	20.9882
	23.8295	168.335
	18.1646	51.937
	16.3306	58.2882
	30.6284	65.3514
	17.9814	23.7403
	21.3908	65.7419
	9.99767	29.3887
	16.67	18.4378
	40.2265	37.1337
	19.5574	58.494
	42.2849	49.8045
	6.77119	24.5311
	11.5293	17.6842
	9.53943	38.6402
	12.2788	40.7458
	12.7655	49.0891
	62.024	100.997
	17.5986	53.3557
	21.6671	44.8178
	29.1199	85.4029
	16.9813	66.9884
	10.3142	17.2599
	7.71436	45.4561
	5.9301	64.6032
	10.2261	37.1745
	11.782	8.38728
	14.1232	27.864
	7.47116	19.8706
	9.79048	9.27449
	9.96654	11.8458
	8.78709	8.87868
	6.31294	9.12114
	9.82487	10.3324
	9.58153	11.9763
	7.26189	4.52969
	6.42944	12.3702
	7.22139	24.6636
	8.89416	21.8764
	5.88504	28.8405
	8.4218	8.14128
	8.3613	22.0291
	5.20434	22.489

[truncated: 44 more sheets: Figure 3d, Figure 3f, Figure 3g, Figure 4c, Figure 4e, Figure 5c, Figure 5d, Figure 5e, Figure 5f, Figure 6c, Figure 6e, Figure 7b, Figure 7c, Figure 7e, Figure 7f, Suppl. Fig. 1c, Suppl. Fig. 1d, Suppl. Fig. 1e, Suppl. Fig. 1f, Suppl. Fig. 2b …]
